# Supplementary material
Source: Springer Nature journal article supplement (https://www.springermedizin.de/resource/supplementary/13058_2011_2912_MOESM12_ESM.pdf/9702798)

**A**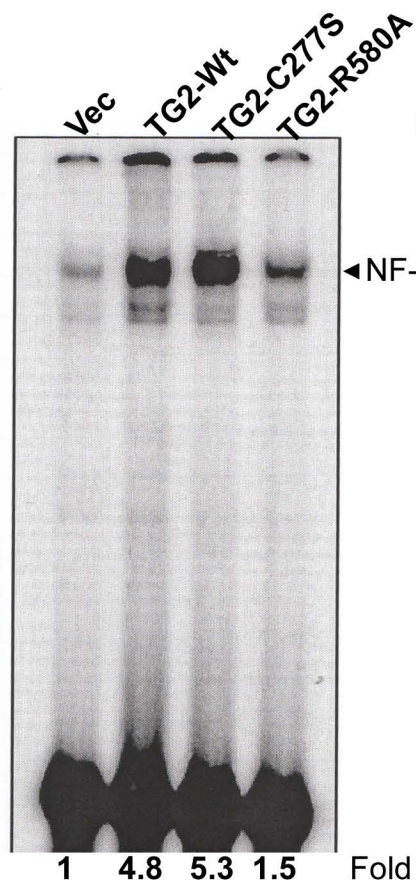**B**

Control siRNA + - -  
 p65 siRNA 1 - + -  
 p65 siRNA 2 - - +

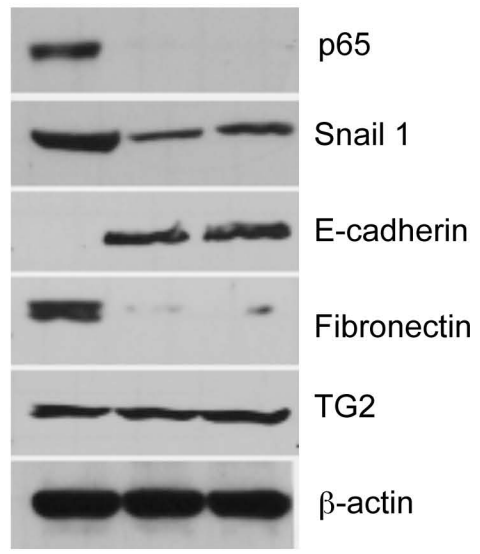**C**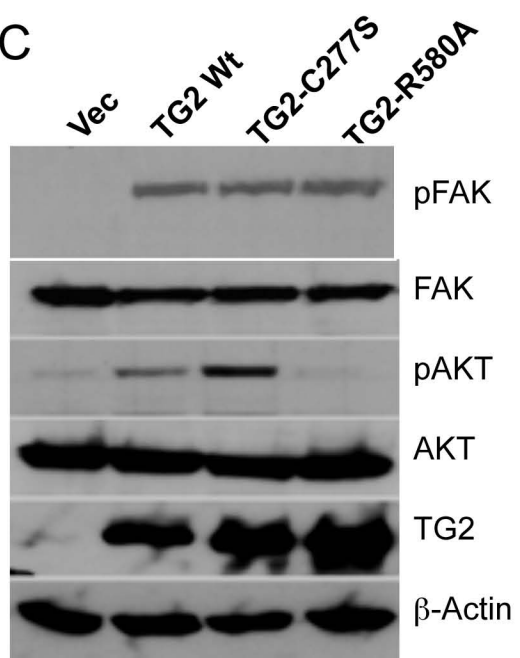

Supplement: MOESM12 [file 9702798]
